# Supplementary material
Source: PubMed Central journal article supplement (PMC4170052)
Supplement: NIHMS619145-supplement-1.pdf [file NIHMS619145-supplement-1.pdf]

## Supplementary Figures:

Supplementary Figure 1

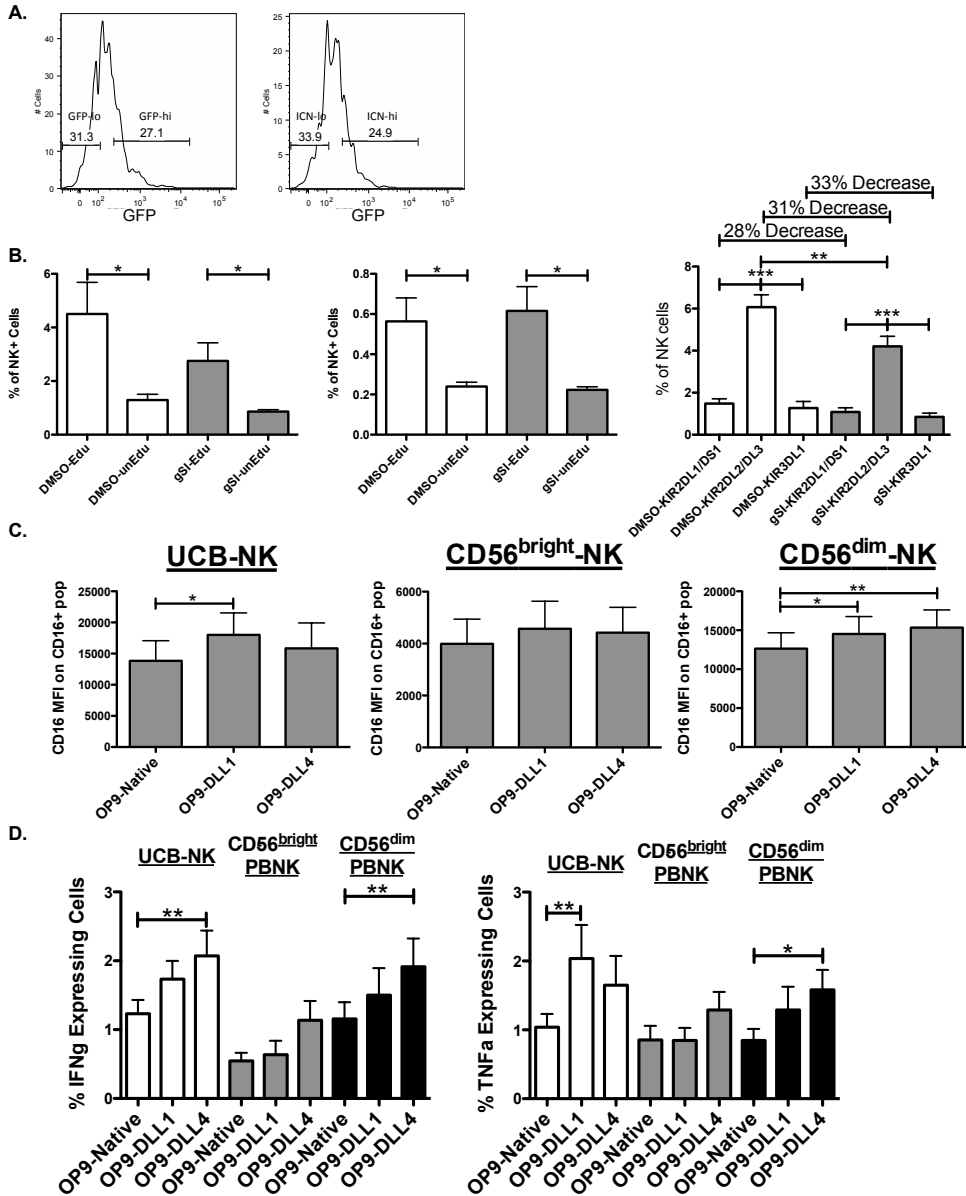

Supplementary Figure 1

(A) UCB CD34-derived NK cells were harvested at day 28, transduced with minicircles expressing GFP alone or GFP plus the active intracellular portion of Notch (ICN), and cultured for 7 days with 10 ng/ml IL-15. Representative histograms of GFP gating strategy on GFP alone (left) or GFP plus ICN (right) transduced samples at the time of harvest. (B) Donors were HLA typed and then CD56<sup>dim</sup> NK cells were sorted from PBMCs and placed in culture for 7 days with IL-15 and DMSO (white bars) or 20  $\mu$ M gSI (grey bars). Single KIR expression for presence (Edu) or absence (unEdu) of self-HLA is displayed for all single KIR (left panel) or single KIR excluding NKG2A (center

panel). Only donors containing at least one uneducated KIR were included in analysis (n = 6). Individual KIR expression (right panel) is also displayed (n = 8). (C) CD16 MFI was assessed on the CD16<sup>+</sup> population of NK cells from (left) day 21 UCB CD34-derived NK cells (n = 4), (center) PBMC sorted CD56<sup>bright</sup>CD3<sup>-</sup>KIR<sup>-</sup> NK cells (n = 8), and (right) PBMC sorted CD56<sup>dim</sup>CD3<sup>-</sup>KIR<sup>-</sup> NK cells (n = 8) after co-culture with 10 ng/ml IL-15 and OP9-Native, OP9-DLL1, or OP9-DLL4 cells for 7 days. (D) UCB CD34-derived NK cells (white bars (n = 15), sorted CD56<sup>bright</sup>KIR<sup>-</sup> PBNK cells (grey bars (n = 7)), and sorted CD56<sup>dim</sup>KIR<sup>-</sup> PBNK cells (black bars (n = 11)) were cultured with 10 ng/ml IL-15 and OP9-N, OP9-DL1, or OP9-DL4 cells for 7 days. Cells were then cross-linked with mouse anti-human CD16 and analyzed for intracellular IFN $\gamma$  (left panel) or TNF $\alpha$  (right panel) five hours after cross-linking.
